# Supplementary material
Source: PubMed Central journal article supplement (PMC6989004)

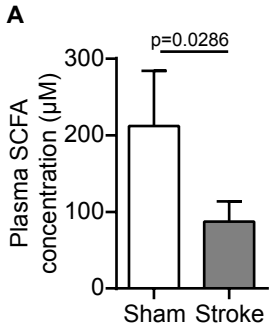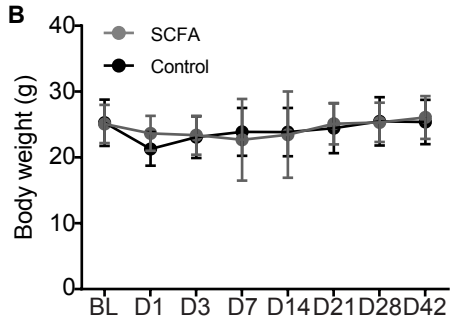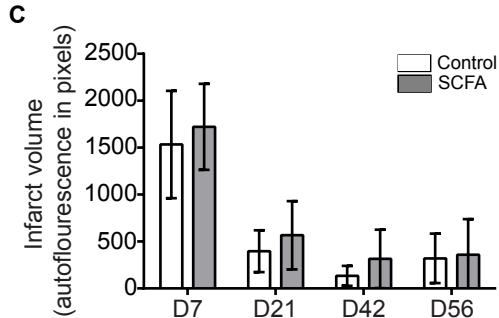

Supplement: sup_ns-JN-RM-1359-19-s01.pdf [file sup_ns-JN-RM-1359-19-s01.pdf]

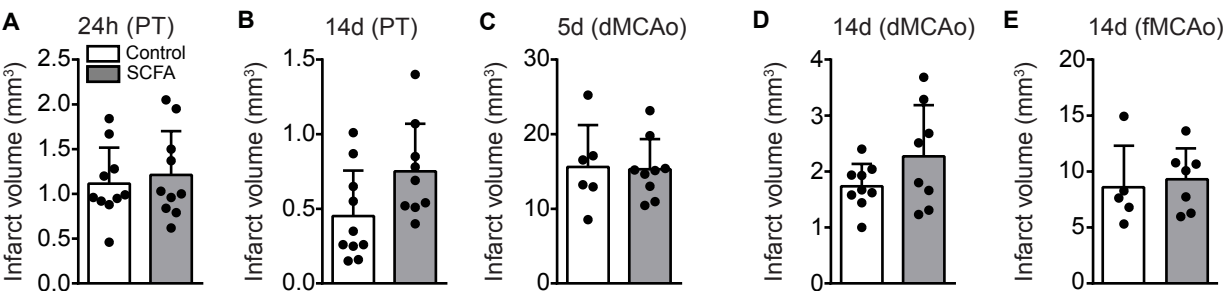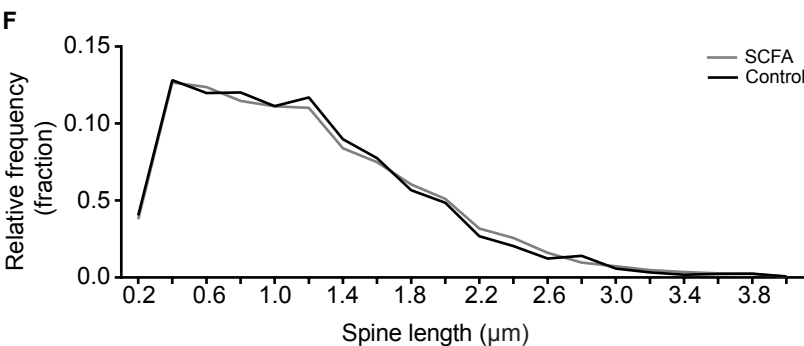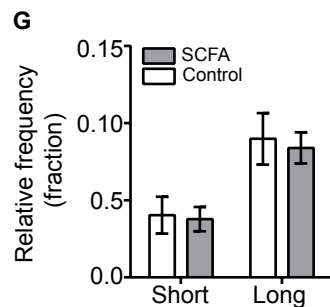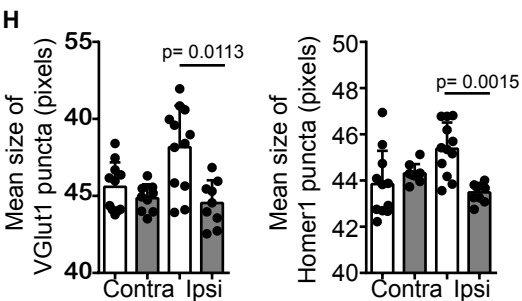

Supplement: sup_ns-JN-RM-1359-19-s02.pdf [file sup_ns-JN-RM-1359-19-s02.pdf]

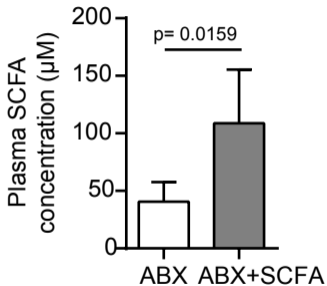

Supplement: sup_ns-JN-RM-1359-19-s03.pdf [file sup_ns-JN-RM-1359-19-s03.pdf]

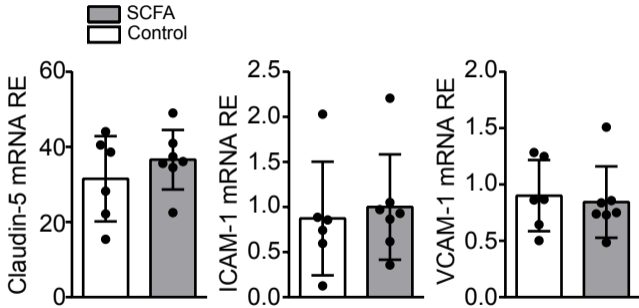

Supplement: sup_ns-JN-RM-1359-19-s04.pdf [file sup_ns-JN-RM-1359-19-s04.pdf]
